# Supplementary material for: Cyanine-based dithienylethenes: synthesis, characterization, photochromism and biological imaging in living cells
Source: Royal Society of Chemistry journal article supplement (doi:10.1039/c4ra12606h), 2014-12-16

## *Supporting Information for*

# **Cyanine-based Dithienylethenes: Synthesis, Characterization, Photochromism and Biological imaging in living cells**

*Fang Hu, Lina Jiang, Meijiao Cao, Zhiqiang Xu, Juanyun Huang, Di Wu, Wenchao Yang,*

*Sheng Hua Liu\* and Jun Yin\**

*Key Laboratory of Pesticide and Chemical Biology, Ministry of Education, College of Chemistry, Central  
China Normal University, Wuhan 430079, P. R. China*

*E-mail: [yinj@mail.ccnu.edu.cn](mailto:yinj@mail.ccnu.edu.cn)*

*[chshliu@mail.ccnu.edu.cn](mailto:chshliu@mail.ccnu.edu.cn)*

|                                                                                                           |           |
|-----------------------------------------------------------------------------------------------------------|-----------|
| <i>1. The solvatochromic properties of cyanine-based dithienylethenes.....</i>                            | <i>S2</i> |
| <i>2. The reversibility and repeatability of cyanine-based dithienylethenes.....</i>                      | <i>S2</i> |
| <i>3. Details of UV-Vis Absorbtion Spectra.....</i>                                                       | <i>S2</i> |
| <i>4. The fluorescence changes of cyanine-based dithienylethenes.....</i>                                 | <i>S3</i> |
| <i>5. The optimized structures and Plots of HOMO and LUMO for cyanine-based<br/>dithienylethenes.....</i> | <i>S3</i> |
| <i>6. The apoptosis data of cells.....</i>                                                                | <i>S4</i> |
| <i>7. The stability test of cyanine-based dithienylethenes.....</i>                                       | <i>S4</i> |
| <i>8. Appendix: NMR and Mass spectra.....</i>                                                             | <i>S4</i> |

## 1. The solvatochromic properties of cyanine-based dithienylethenes.

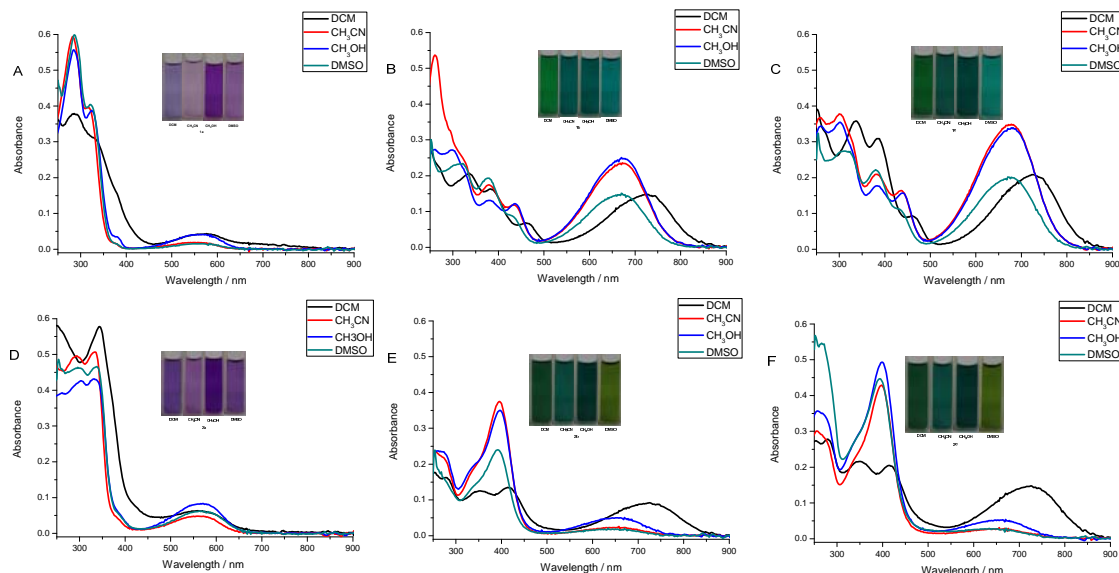

**Figure S1.** Absorption spectral changes of cyanine-based dithienylethenes **1a** (A), **1b** (B), **1c** (C), **2a** (D), **2b** (E) and **2c** (F) by photoirradiation in different solvents ( $2.0 \times 10^{-5}$  mol/L).

## 2. The reversibility and repeatability of cyanine-based dithienylethenes.

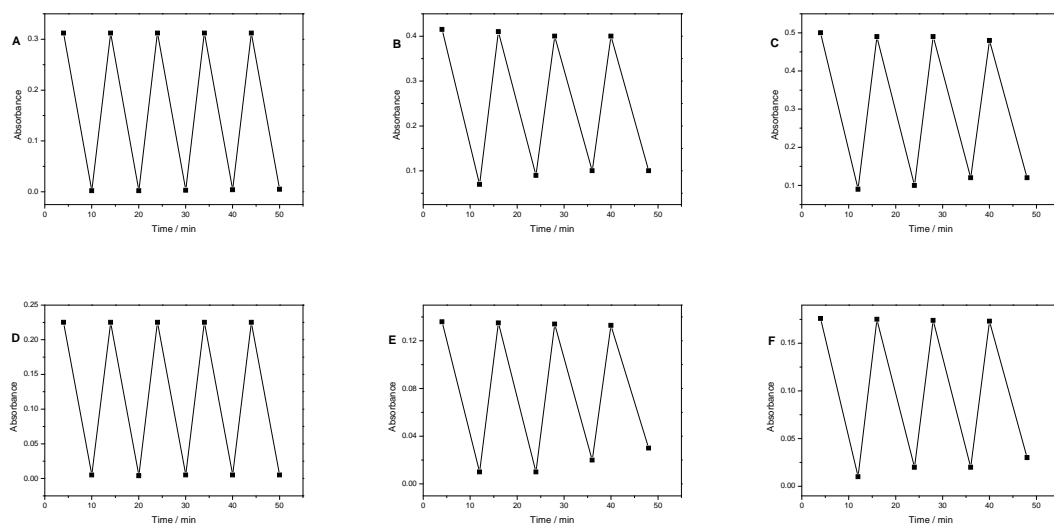

**Figure S2.** The reversibility and repeatability of cyanine-based dithienylethenes **1a** (A), **1b** (B), **1c** (C), **2a** (D), **2b** (E) and **2c** (F) by photoirradiation in  $\text{CH}_2\text{Cl}_2$  ( $2.0 \times 10^{-5}$  mol/L).

## 3. Details of UV-Vis Absorption Spectra.

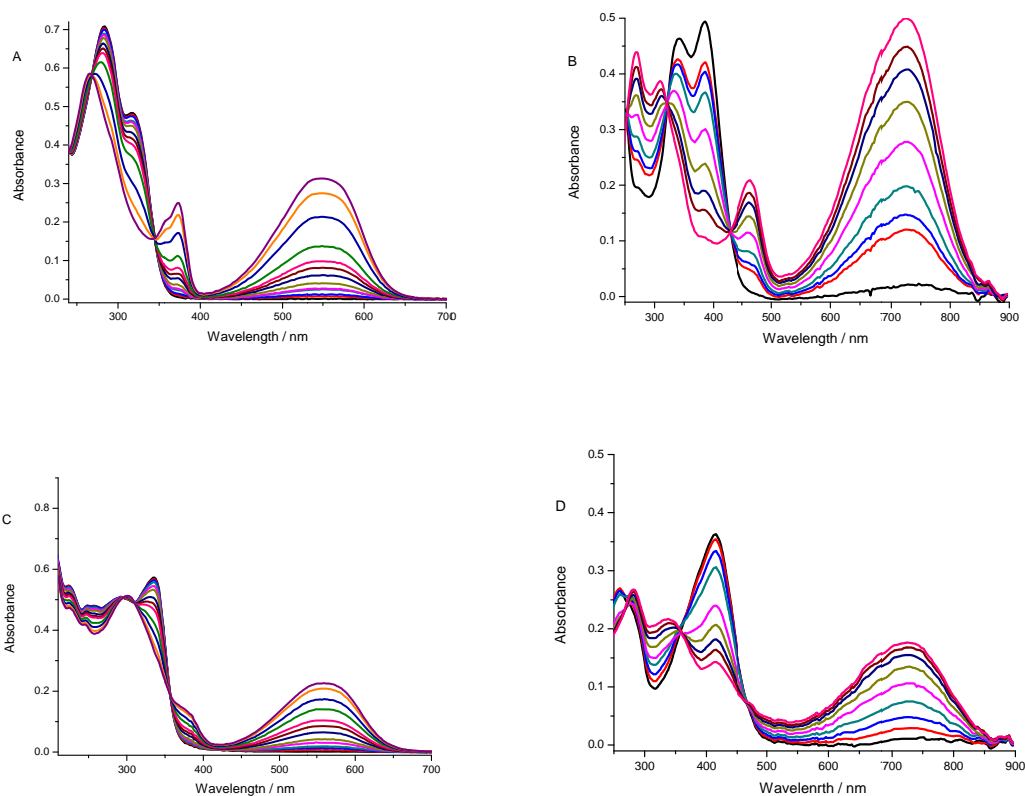

**Figure S3.** Absorption spectral changes of cyanine-based dithienylethenes **1a** (A), **1c** (B), **2a** (C) and **2c** (D) by photoirradiation in  $\text{CH}_2\text{Cl}_2$  ( $2.0 \times 10^{-5}$  mol/L).

#### 4. The fluorescence changes of cyanine-based dithienylethenes.

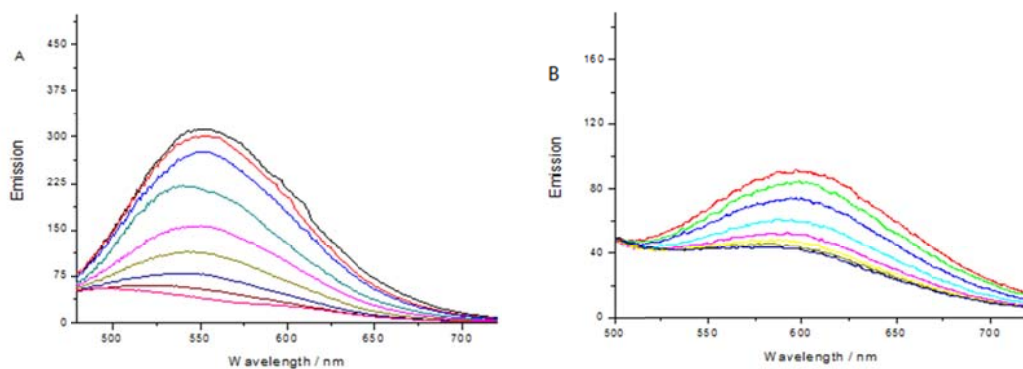

**Figure S4.** The fluorescence changes of cyanine-based dithienylethenes **1c** (A) and **2c** (B) by photoirradiation in  $\text{CH}_2\text{Cl}_2$  ( $2.0 \times 10^{-5}$  mol/L).

#### 5. The optimized structures and Plots of HOMO and LUMO for cyanine-based dithienylethenes.

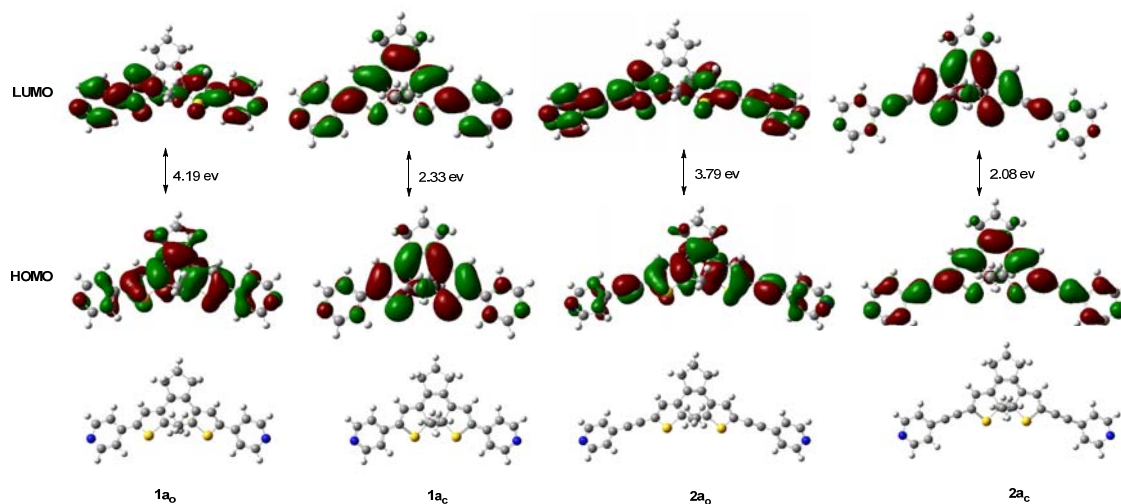

**Figure S5.** The optimized structures and Plots of HOMO and LUMO for cyanine-based dithienylethenes at B3LYP/6-31G\* level, by using Gaussian 09 program.

### 6. The apoptosis data of cells.

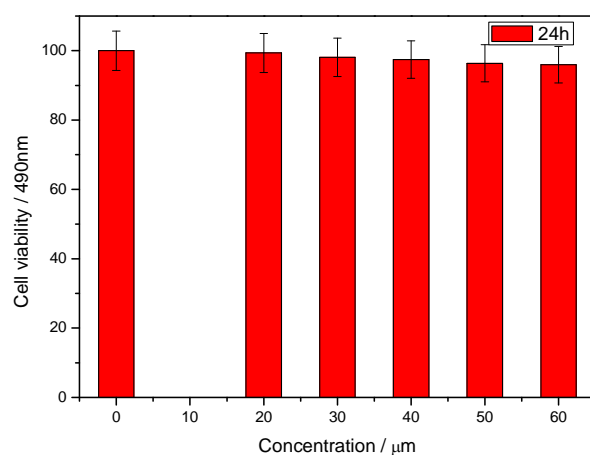

**Figure S6.** Cell viability value (%) by MTT method.

### 7. The stability test of cyanine-based dithienylethenes .

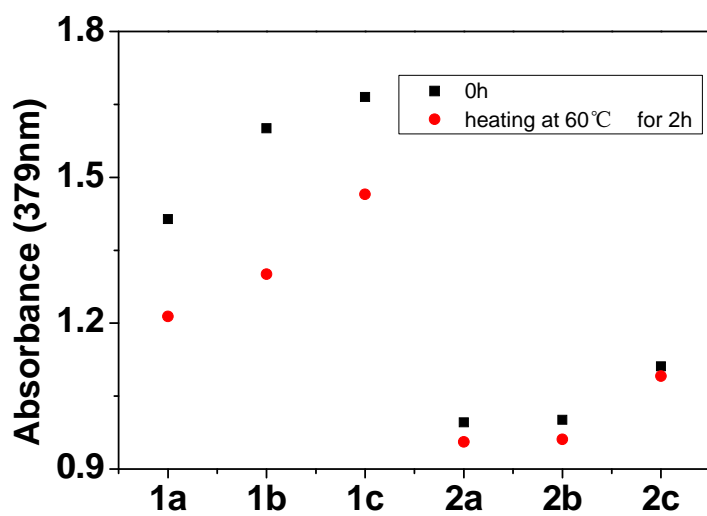

Figure S7. The stability test of cyanine-based dithienylethenes

### 8. Appendix: NMR and Mass spectra.

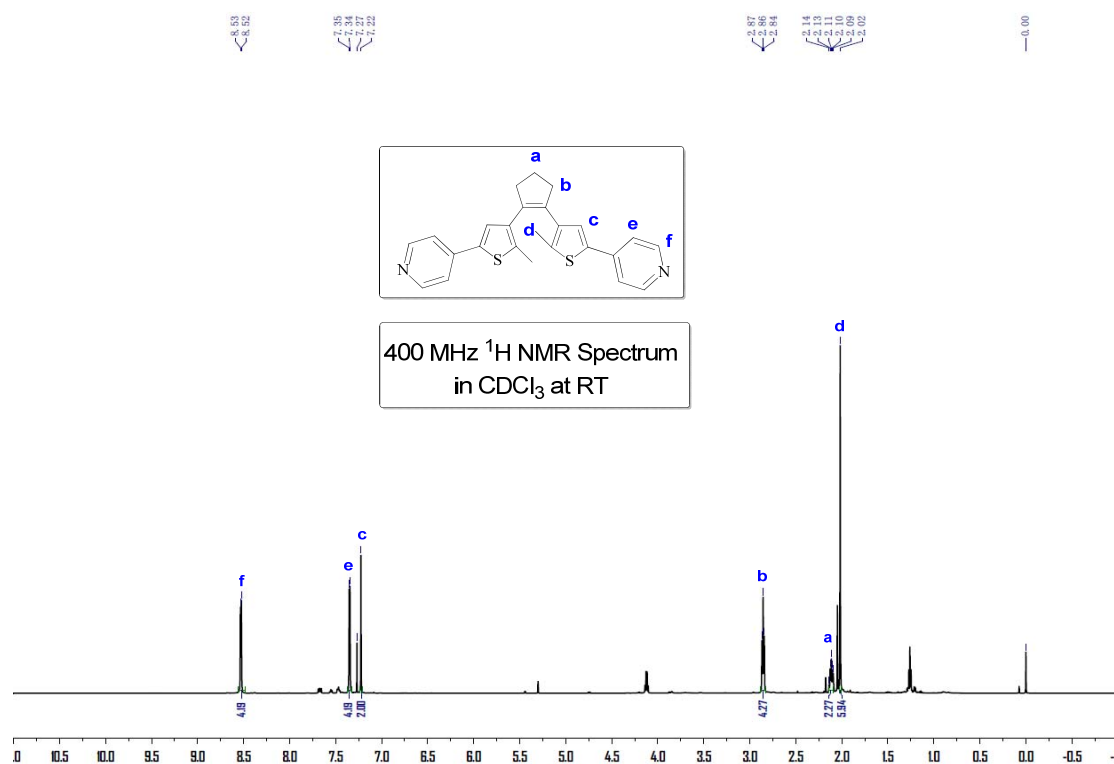

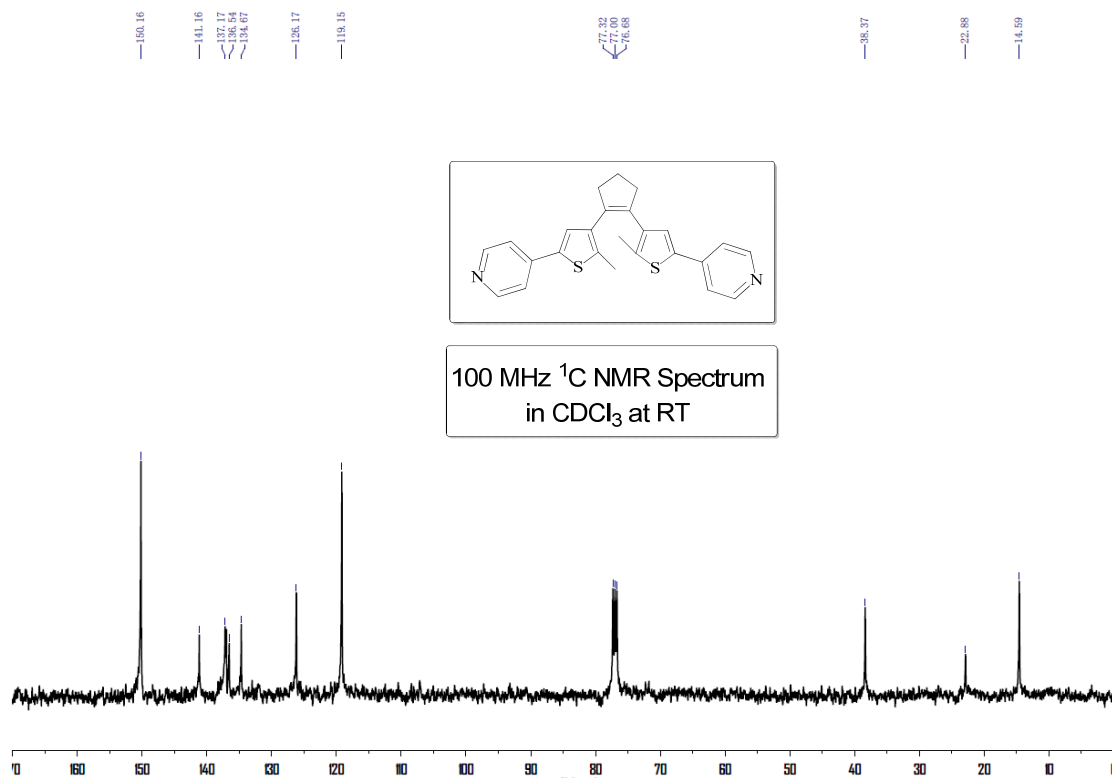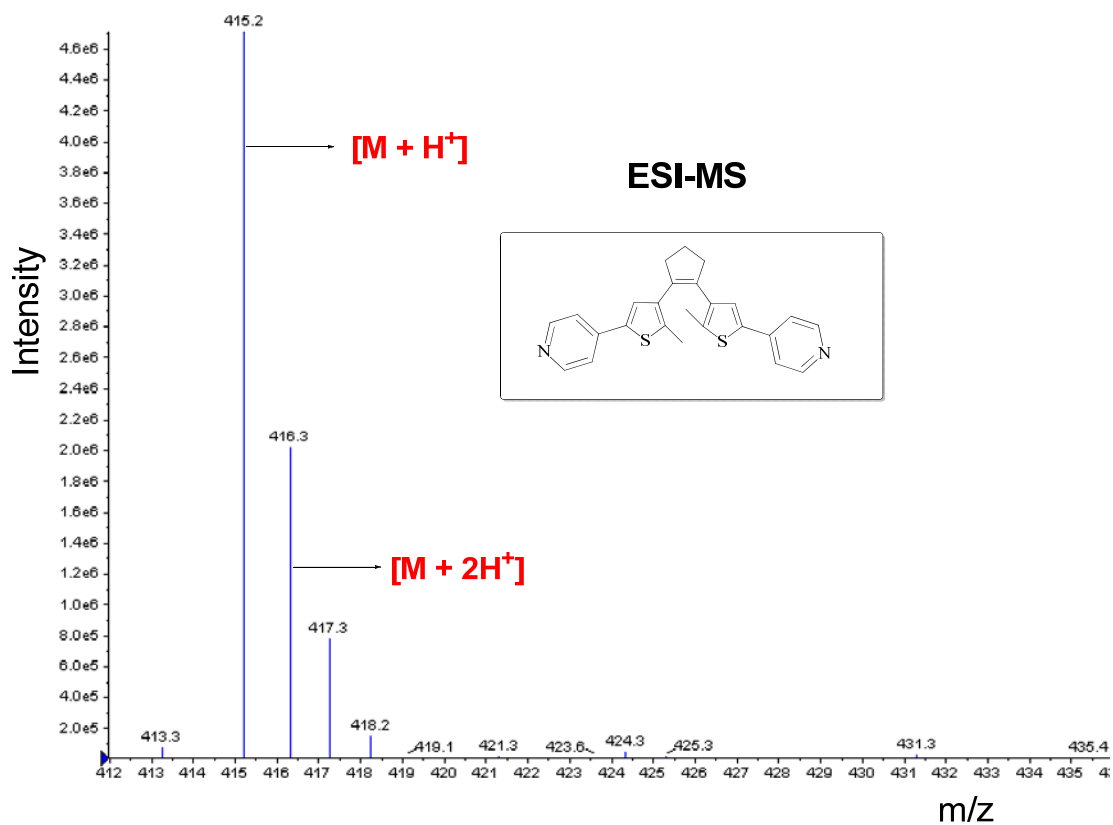

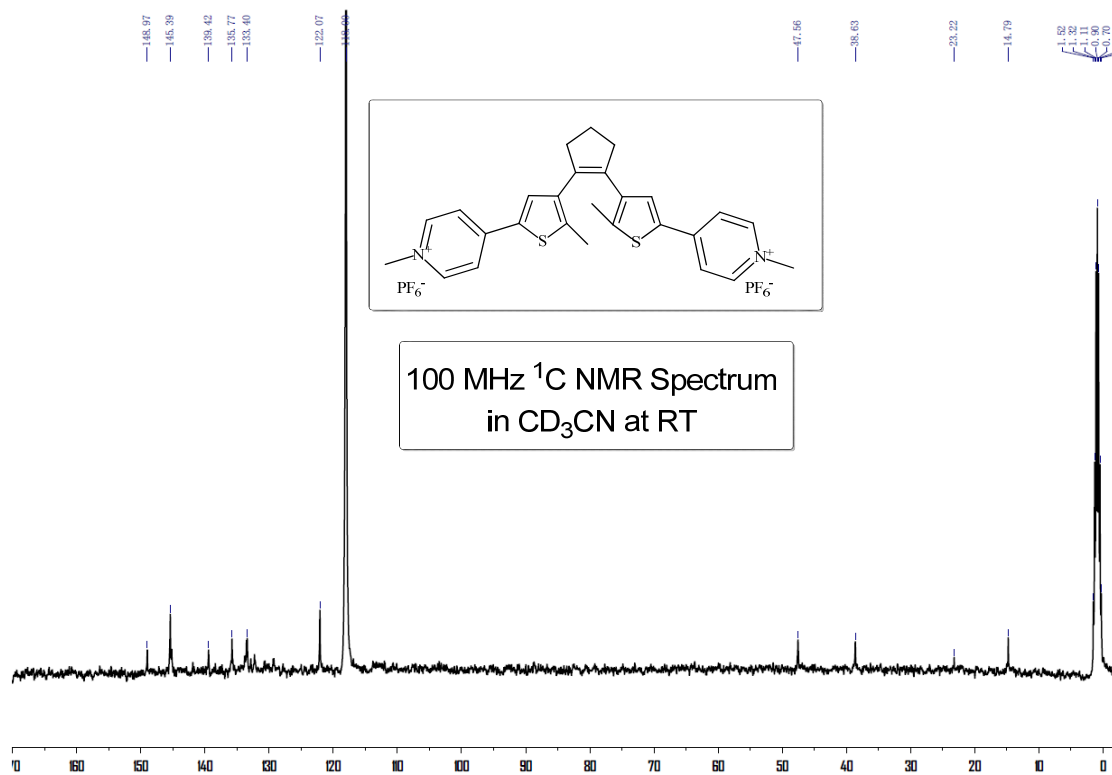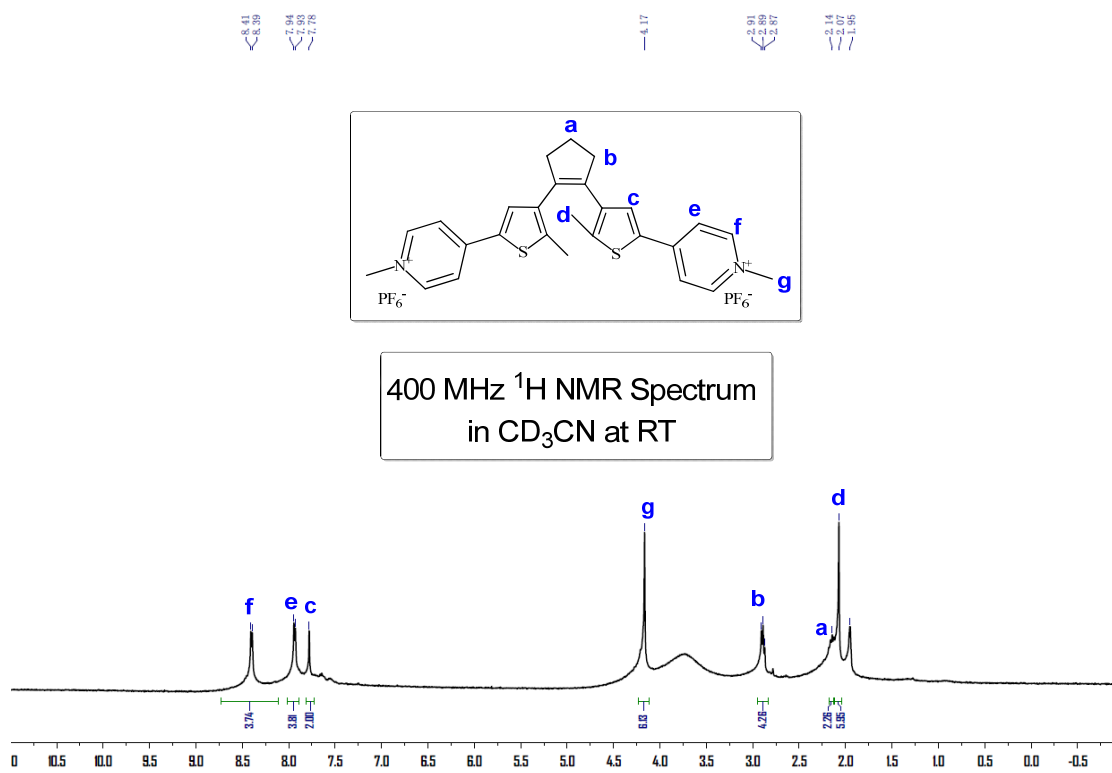

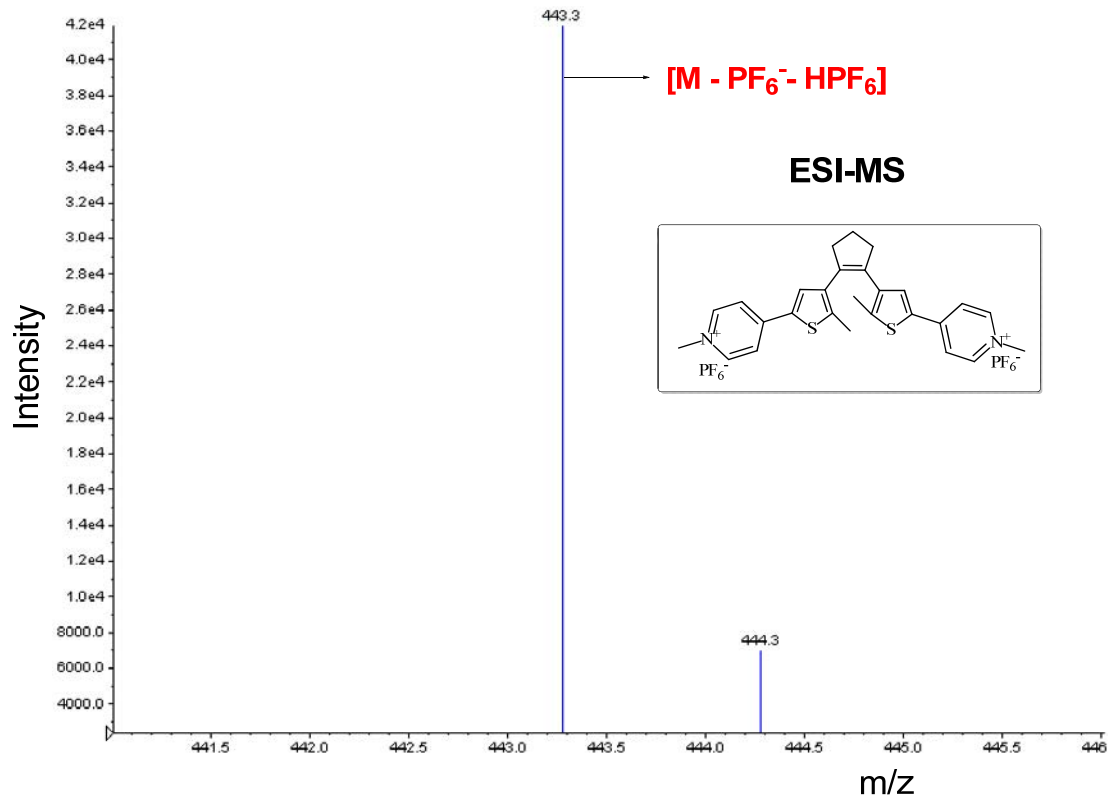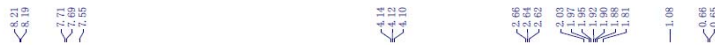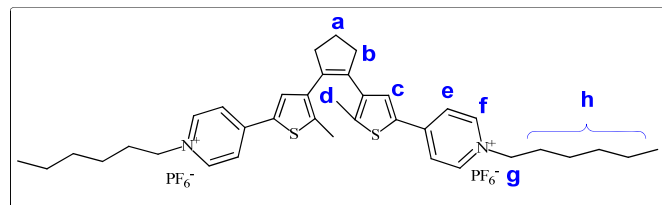

400 MHz <sup>1</sup>H NMR Spectrum  
in CD<sub>3</sub>CN at RT

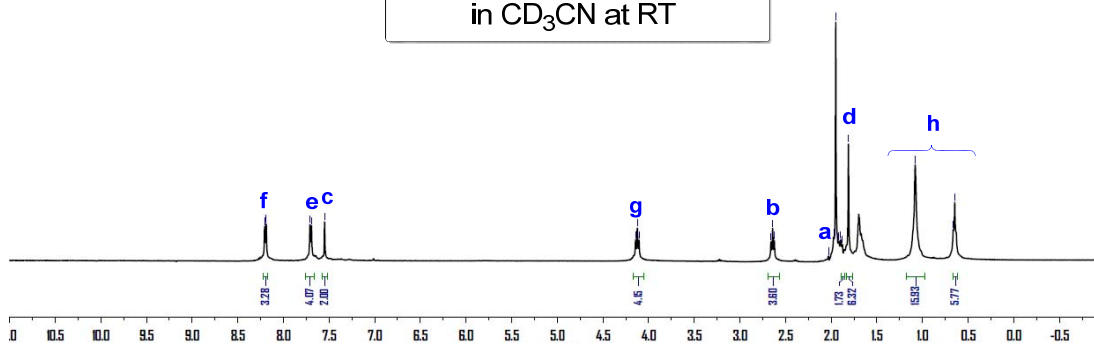



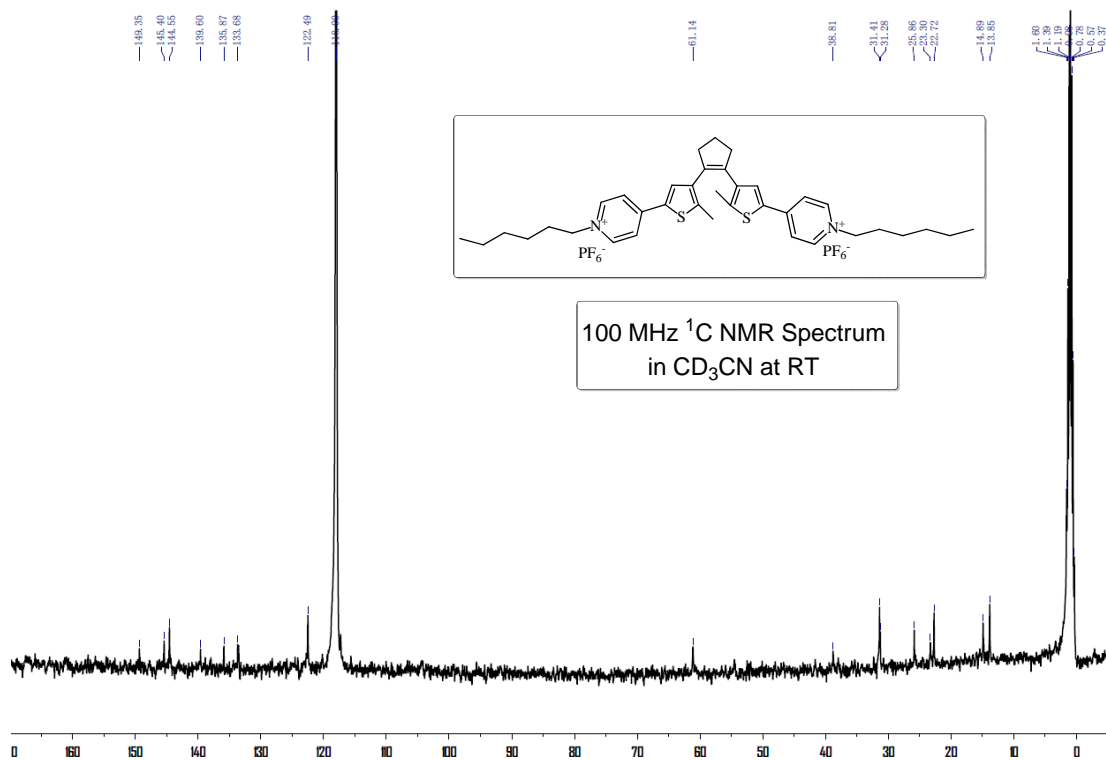

HF178 #723 RT: 4.37 AV: 1 SB: 725 0.04-3.97, 4.92-5.33 NL: 1.60E4  
T: + c Fullms [40.00-650.00]

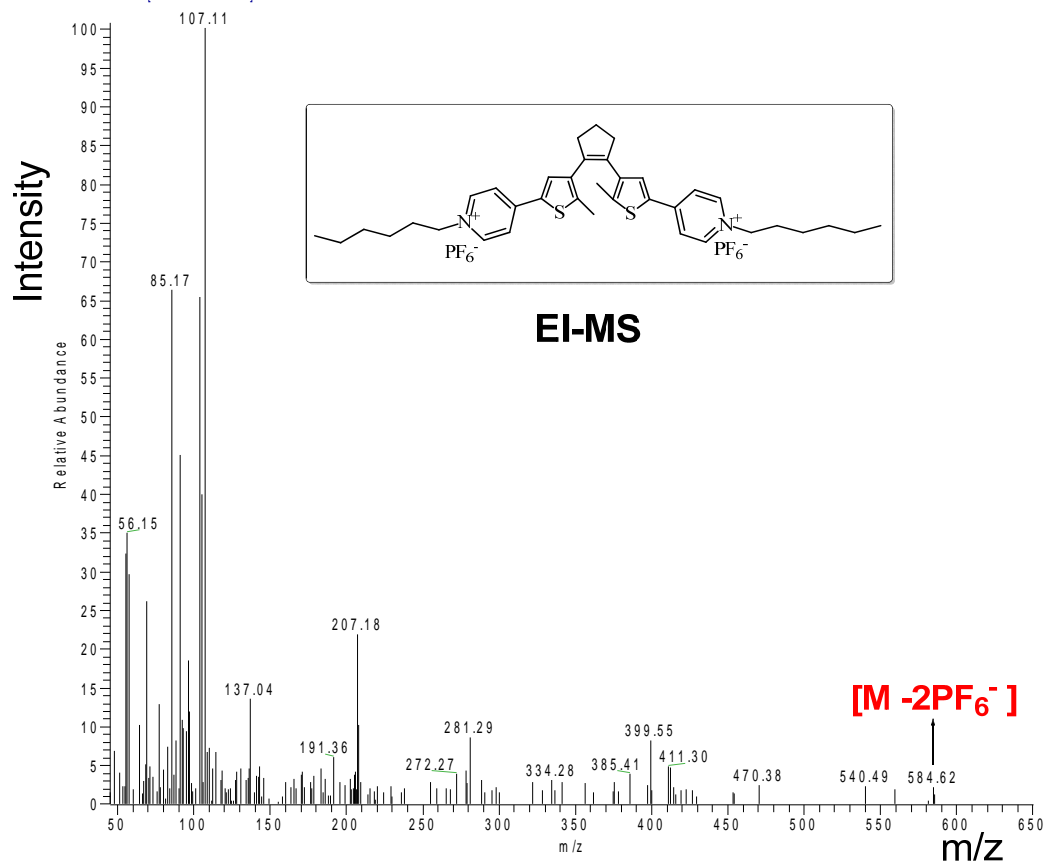

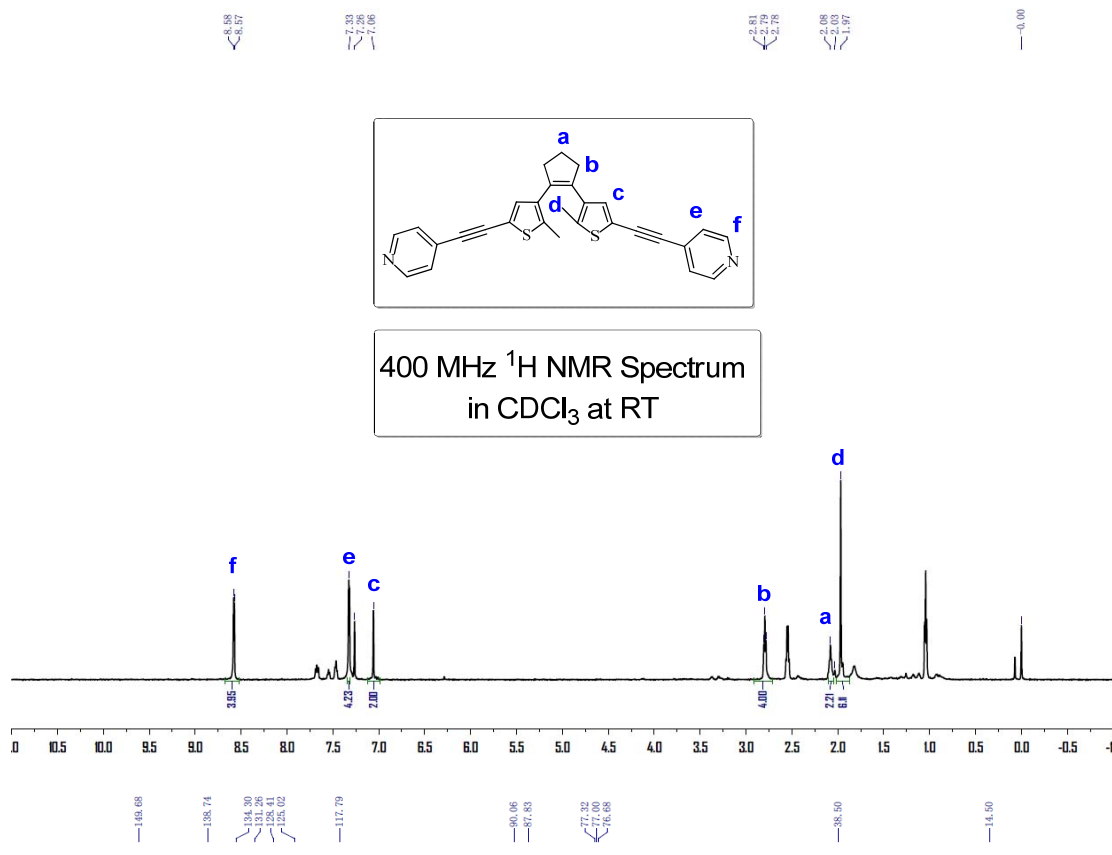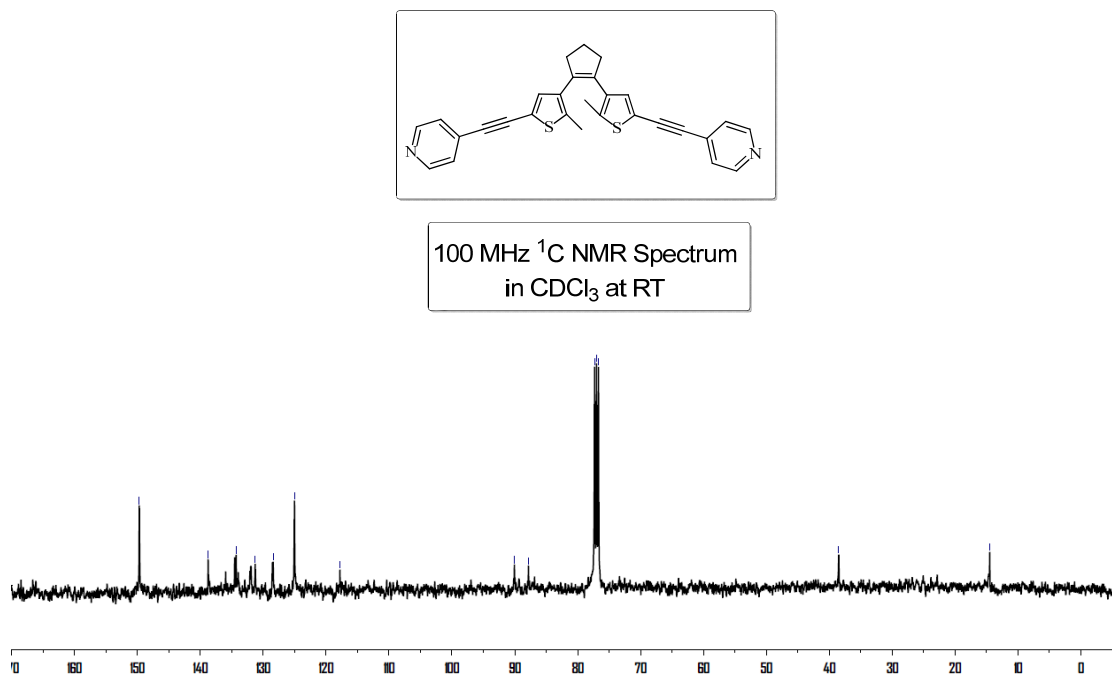

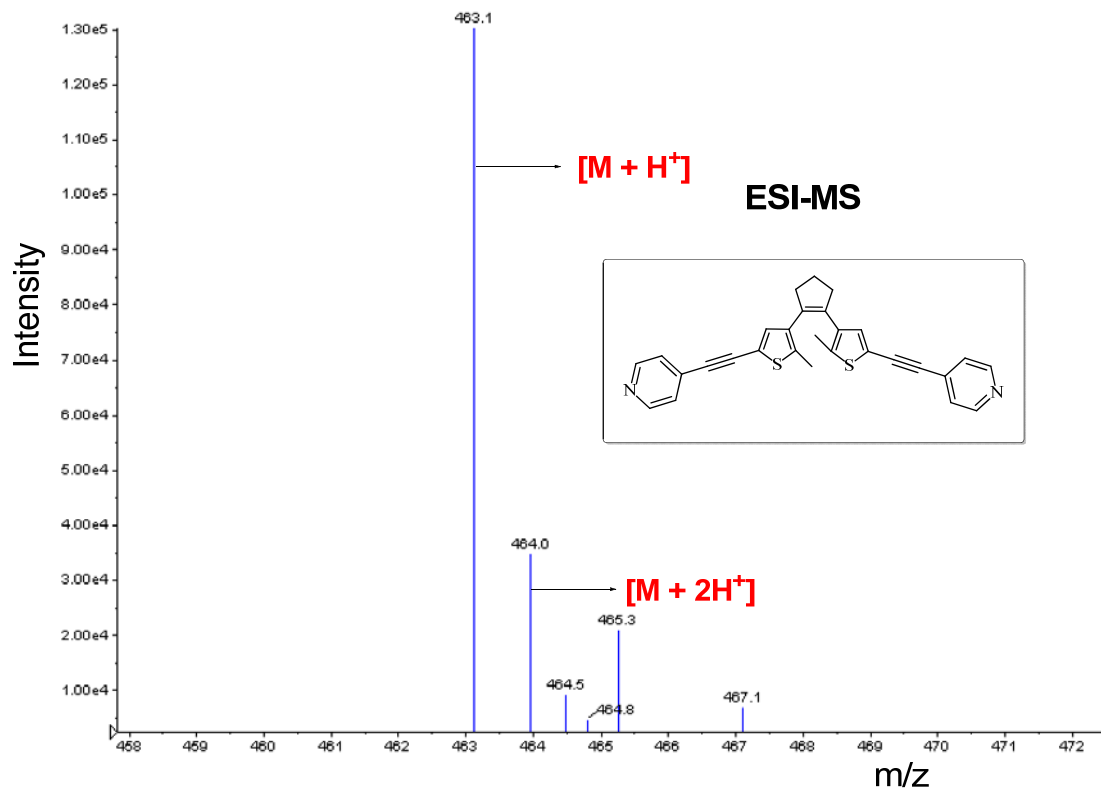

8.51  
8.49  
7.90  
7.88  
7.35  
4.22  
2.98  
2.93  
2.12  
2.10  
2.08  
2.06  
1.95

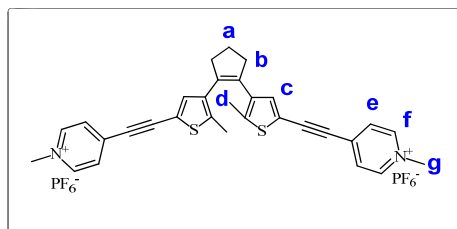

400 MHz  $^1H$  NMR Spectrum  
in  $CD_3CN$  at RT

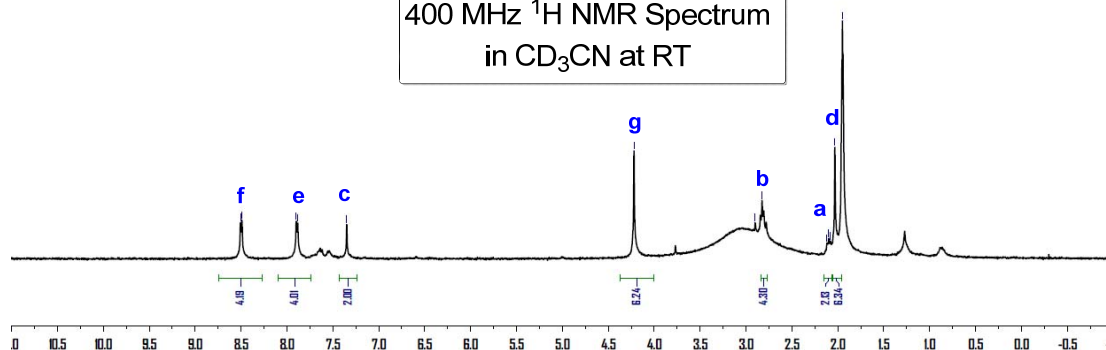

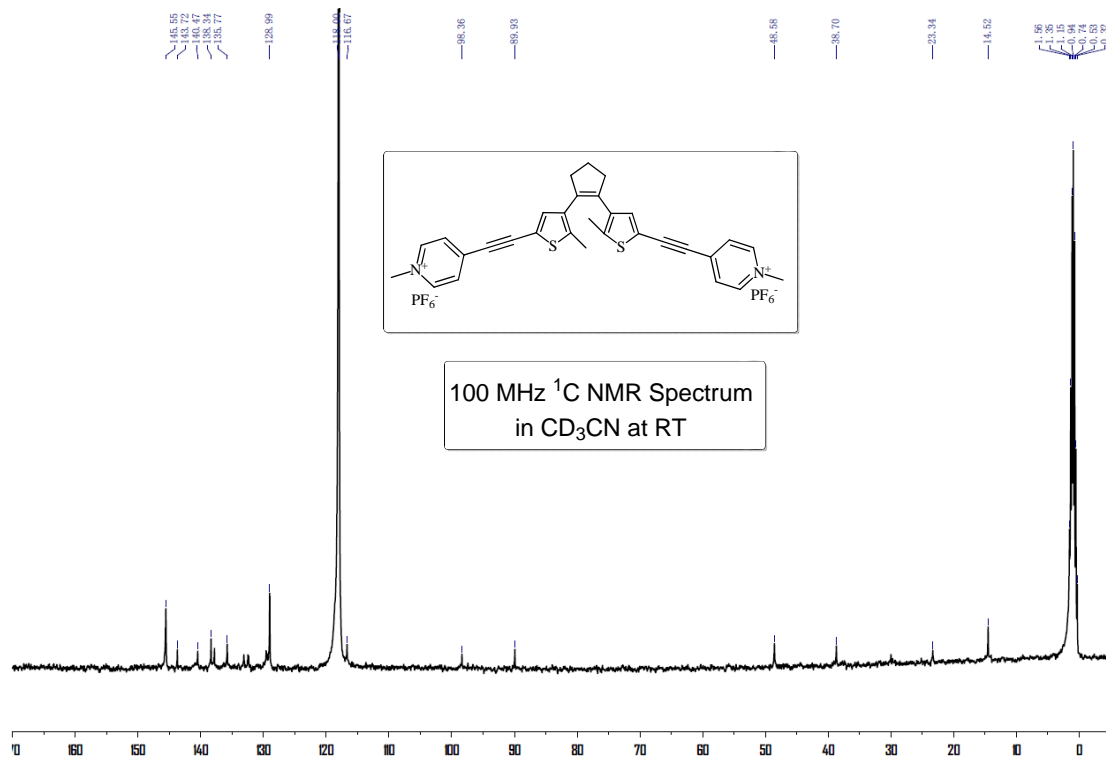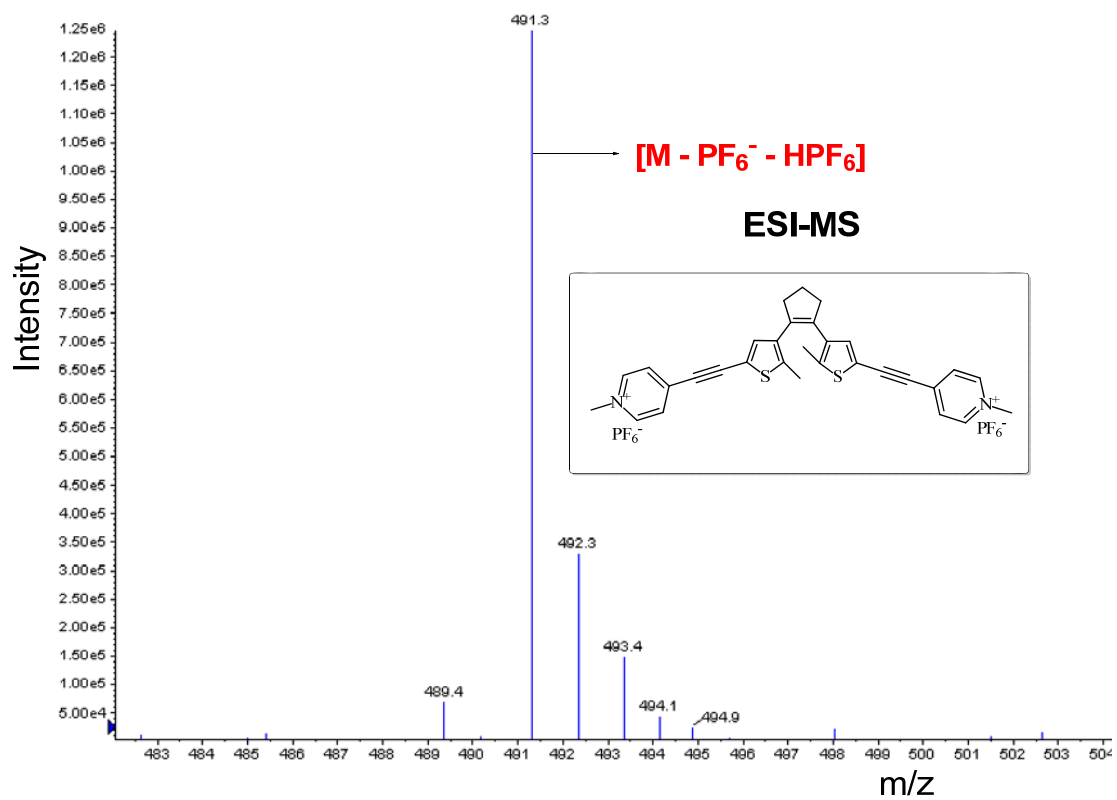

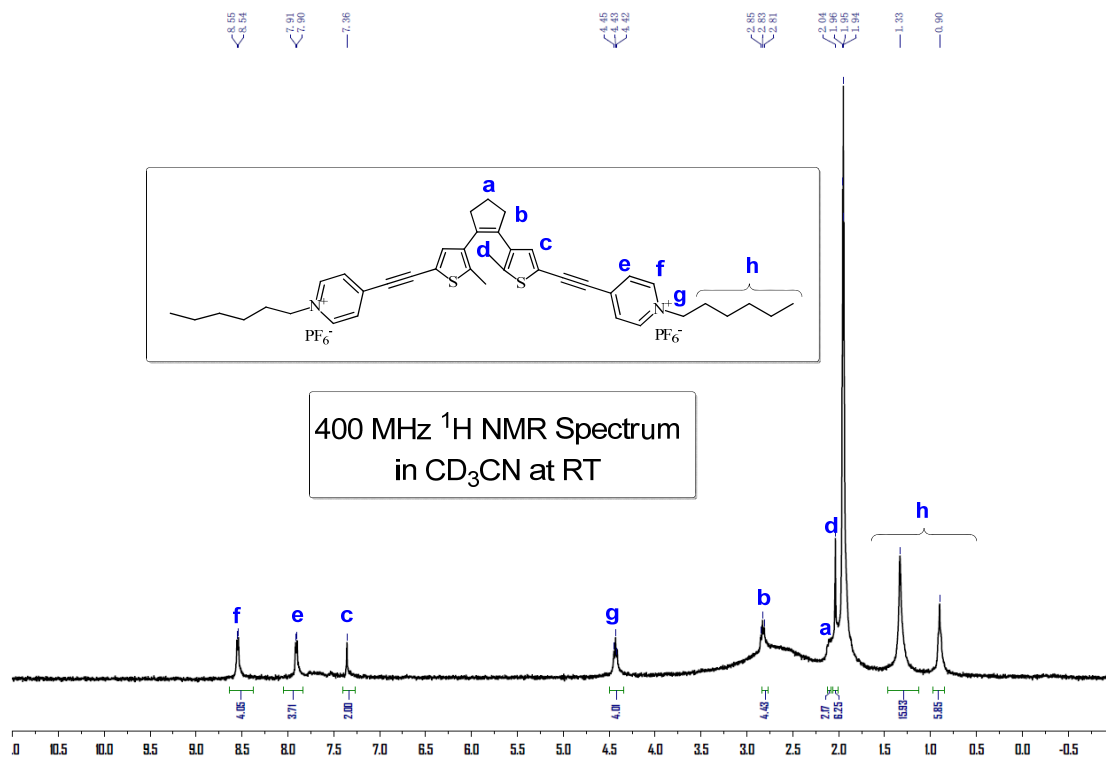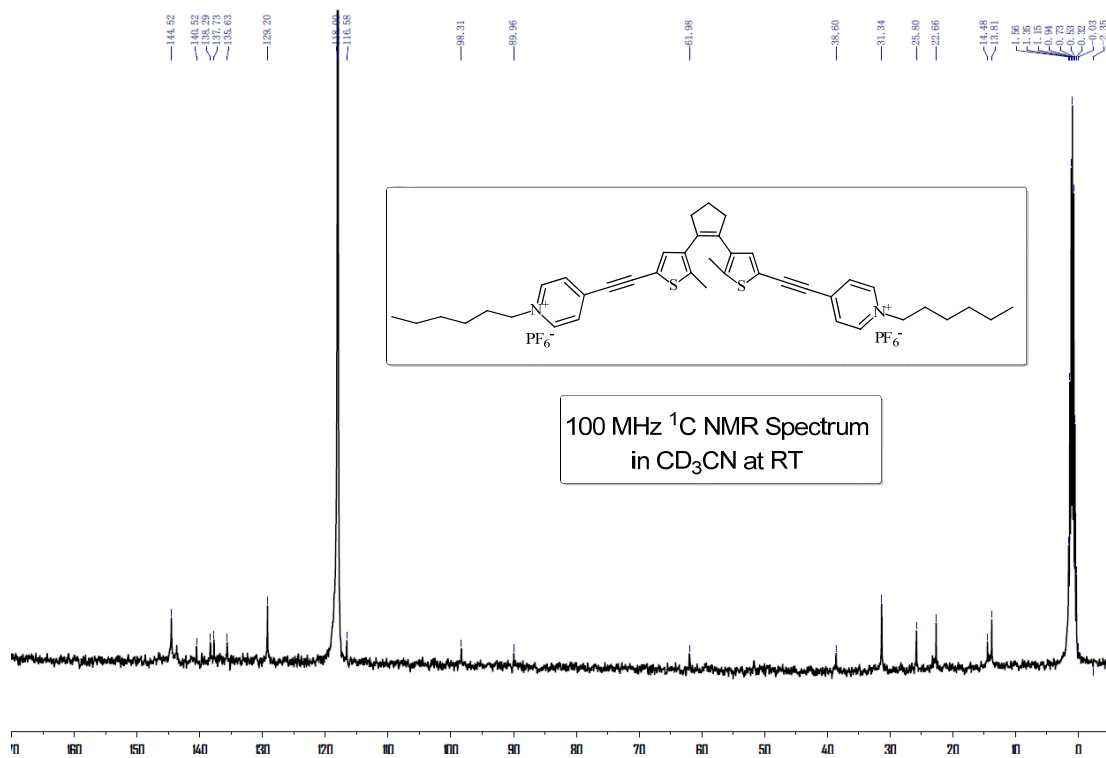

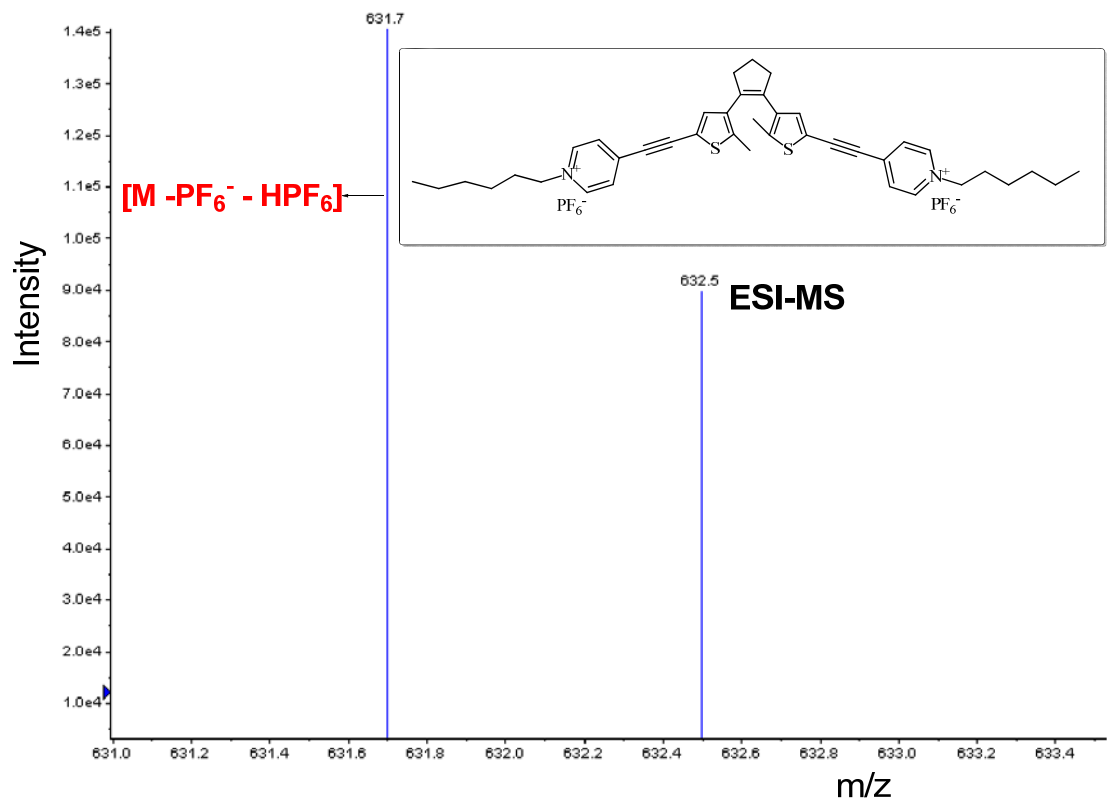

Supplement: c4ra12606h1.pdf [file c4ra12606h1.pdf]
